# Supplementary material for: Posterolateral Fusion Versus Interbody Fusion for Degenerative Spondylolisthesis: Systematic Review and Meta-Analysis
Source: PubMed Central journal article supplement — Global Spine J. 2017 May 31;7(5):482–90. doi: 10.1177/2192568217701103 (PMC5544162; doi:10.1177/2192568217701103), 2017-05-31

| Study            | Instrumentation for PLF                                                                    | Instrumentation for PLIF/TLIF | Definition of instability                                                                                                                                                                                         | Pre/postoperative slip (mm)                                        | Pre/postoperative slip local disc angle (deg)                                                                                                                                         |
|------------------|--------------------------------------------------------------------------------------------|-------------------------------|-------------------------------------------------------------------------------------------------------------------------------------------------------------------------------------------------------------------|--------------------------------------------------------------------|---------------------------------------------------------------------------------------------------------------------------------------------------------------------------------------|
| Abdu et al       | 80/293 (27.3%) had in-situ fusion. 213/293 (72.7%) had instrumentation with pedicle screws | Pedicle screw + interbody     | Change of more than 10° of angulation or more than 4mm of translation of the vertebrae between flexion and extension.<br><br>3/80 (3.75%) of PLF group was unstable. 4/63 (6.3%) of PLIF/TLIF group was unstable. | NR                                                                 | NR                                                                                                                                                                                    |
| Fujimori et al   | Pedicle screws                                                                             | Pedicle screws and interbody  |                                                                                                                                                                                                                   | PLF: 5.2±3.5 mm / 4.1±3.1 mm<br>PLIF/TLIF: 5.3±2.9 mm / 1.7±2.3 mm | PLF: 4.2±3.5 / 4.5±2.6 deg<br>PLIF/TLIF: 6±4.3/6±3.9 deg                                                                                                                              |
| Gottschalk et al | Pedicle screws                                                                             | Pedicle screws + interbody    | NR                                                                                                                                                                                                                | NR                                                                 | NR                                                                                                                                                                                    |
| Ha et al         | Pedicle screws                                                                             | Pedicle screws + interbody    | Degree of slip >4mm and slip angle >10°.<br><br>PLF: 8/21 (38.1%) unstable. PLIF/TLIF: 8/19 (42.1%) unstable                                                                                                      | NR                                                                 | PLF (stable): 3.8± 5.7 /6.4± 5.4 deg<br>PLF (unstable): 6.9± 3.2 / 5.4± 5.7 deg<br><br>PLIF/TLIF (stable): 6.1 ± 6.7/ 3.0 ± 5.3 deg<br>PLIF/TLIF (unstable): 6.0 ± 9.1/ 5.7 ± 5.8 deg |
| Kuraishi et al   | Pedicle screws                                                                             | Pedicle screws + interbody    | Meyerding grade II or more, slip ≥10 deg, or ≥4mm in maximum flexion/extension, and posterior opening ≥5 deg in maximum flexion                                                                                   | PLF: 7.2±3.9 / 6.4±4.1 mm.<br>PLIF/TLIF: 5.7±3.0/ 1.8±2.6 mm.      | PLF: 2.9°±7.2° / -0.5°±8.9°<br>PLIF/TLIF: 6.9°±6.2° / 8.9°±5.7°                                                                                                                       |

|                 |                |                            |    |    |                                                    |
|-----------------|----------------|----------------------------|----|----|----------------------------------------------------|
| Sivaraman et al | Pedicle screws | Pedicle screws + interbody | NR | NR | PLF: 16.6 / 22.7 deg<br>PLIF/TLIF: 15.6 / 21.2 deg |
|-----------------|----------------|----------------------------|----|----|----------------------------------------------------|

NR, not reported

Supplementary Figure 1. Sensitivity analysis of complication rate

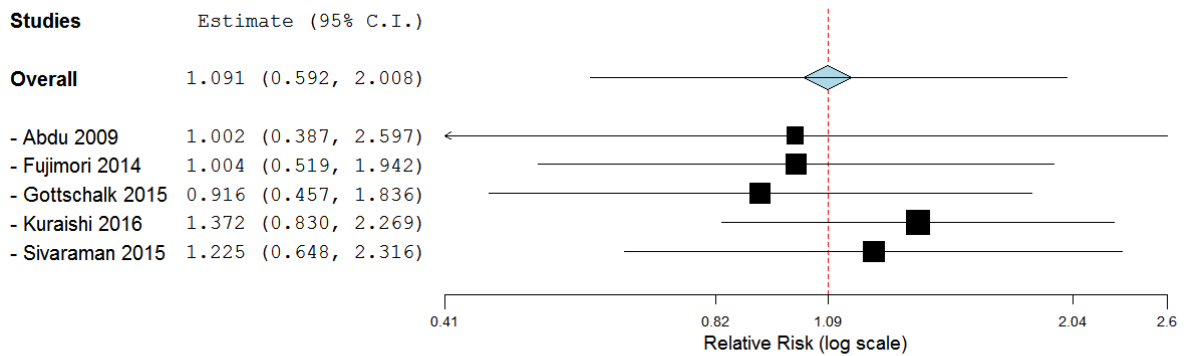

Supplementary Figure 2. Sensitivity analysis of fusion rate

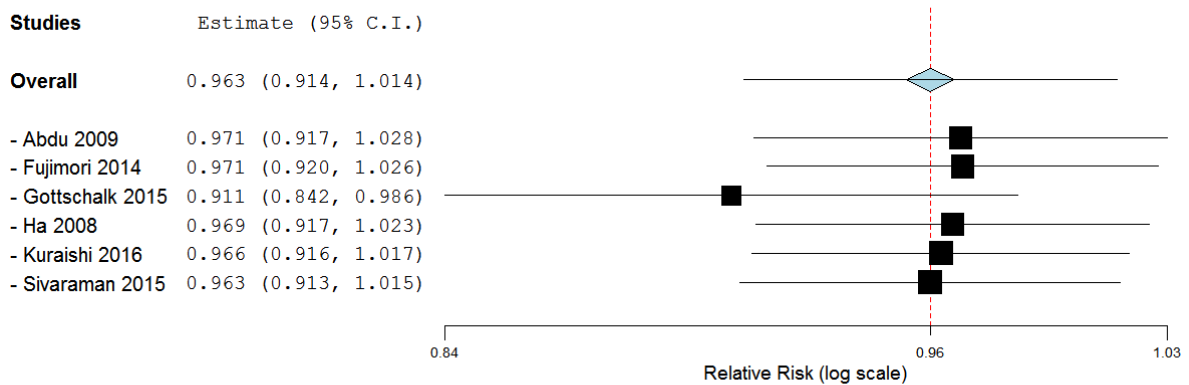

Supplementary Figure 3. Sensitivity analysis of reoperations

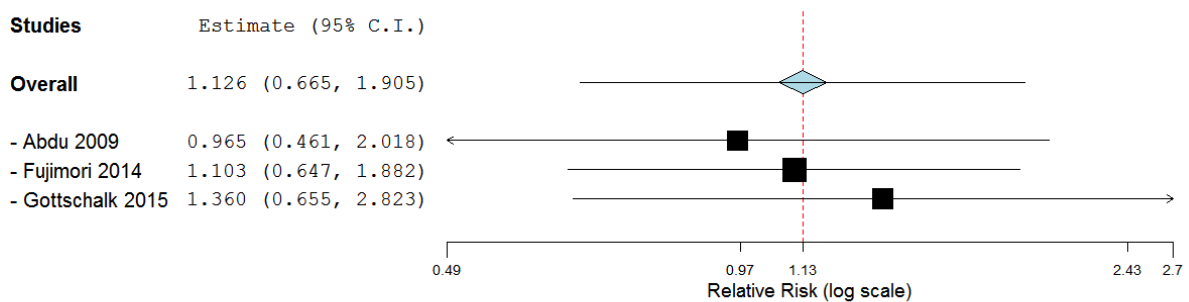

Supplementary Figure 4. Sensitivity analysis of postoperative ODI scores

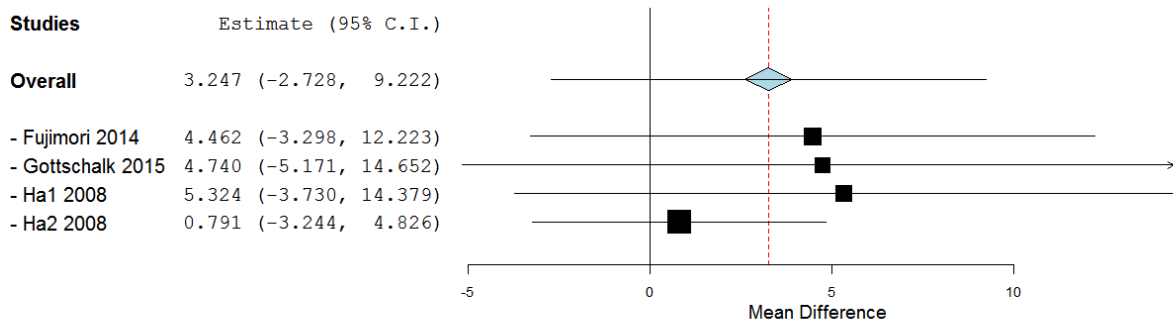

Supplementary Figure 5. Sensitivity analysis of postoperative VAS scores

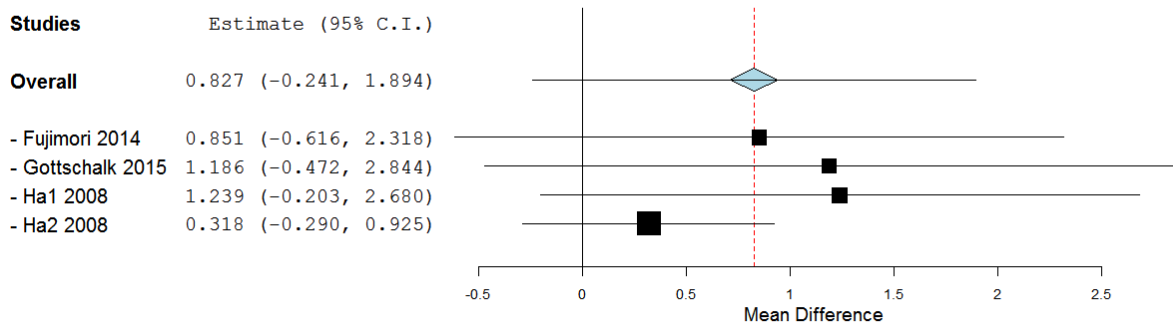

Supplement: GSJ701103_suppl_mat.pdf [file GSJ701103_suppl_mat.pdf]
